# Supplementary material
Source: PubMed Central journal article supplement (PMC5728339)
Supplement: ba008250-suppl1.pdf [file ba008250-suppl1.pdf]

| Supplementary Table 1. Additional Patient Characteristics |                     |     |                                    |                                                                  |       |             |                |                        |  |
|-----------------------------------------------------------|---------------------|-----|------------------------------------|------------------------------------------------------------------|-------|-------------|----------------|------------------------|--|
| Patient Number                                            | Age at HSCT (years) | Sex | Disease                            | Conditioning Regimen                                             | Donor | Cell Source | aGVHD          | Response to Eculizumab |  |
| 1                                                         | 8.0                 | F   | B-Thalassemia                      | Busulfan/ Melphalan/ Thiotepa                                    | MUD   | Bone Marrow | Yes, stage III | Yes                    |  |
| 2                                                         | 1.0                 | F   | Hemophagocytic Lymphohistiocytosis | Alemtuzumab/ Fludarabine/ Melphalan                              | MUD   | Bone Marrow | no             | Yes                    |  |
| 3                                                         | 5.0                 | M   | Neuroblastoma                      | Cyclophosphamide/ Thiotepa;<br>Carboplatin/ Melphalan/ Etoposide | Auto  | PBSC        | n/a            | Yes                    |  |
| 4                                                         | 10.8                | F   | Acute Lymphoblastic Leukemia       | Cyclophosphamide/ Total Body Irradiation                         | MUD   | Bone Marrow | Yes, stage I   | n/a                    |  |
| 5                                                         | 5.1                 | F   | Hemophagocytic Lymphohistiocytosis | Alemtuzumab/ Fludarabine/ Melphalan                              | MUD   | Bone Marrow | Yes, stage III | Yes                    |  |
| 6                                                         | 18.0                | M   | Acute Myeloid Leukemia             | Busulfan/ Cyclophosphamide                                       | MUD   | Bone Marrow | Yes, stage IV  | Yes                    |  |
| 7                                                         | 8.0                 | M   | Diamond Blackfan Anemia            | Busulfan/ Cyclophosphamide                                       | MUD   | Bone Marrow | no             | n/a                    |  |
| 8                                                         | 9.6                 | N   | Neuroblastoma                      | Cyclophosphamide/ Thiotepa;<br>Carboplatin/ Melphalan/ Etoposide | Auto  | PBSC        | n/a            | n/a                    |  |
| 9                                                         | 1.5                 | M   | Hurler's Syndrome                  | Alemtuzumab/ Busulfan/ Fludarabine                               | MUD   | Bone Marrow | no             | n/a                    |  |
| 10                                                        | 0.9                 | F   | Hurler's Syndrome                  | Busulfan/ Fludarabine                                            | MUD   | Cord Blood  | No             | n/a                    |  |
| 11                                                        | 17.0                | M   | Atypical Teratoid/ Rhabdoid Tumor  | Cisplatin/ Cyclophosphamide/ Vincristine                         | Auto  | PBSC        | n/a            | n/a                    |  |

Note: MUD: Matched Unrelated Donor; Auto: Autologous Transplant; PBSC: Peripheral Blood Stem Cells
